# Supplementary material for: Apple phenolic extracts ameliorate lead-induced cognitive impairment and depression- and anxiety-like behavior in mice by abating oxidative stress, inflammation and apoptosisviathe miR-22-3p/SIRT1 axis
Source: Royal Society of Chemistry journal article supplement (doi:10.1039/d1fo03750a), 2022-01-01
Supplement: d1fo03750a1.pdf [file d1fo03750a1.pdf]

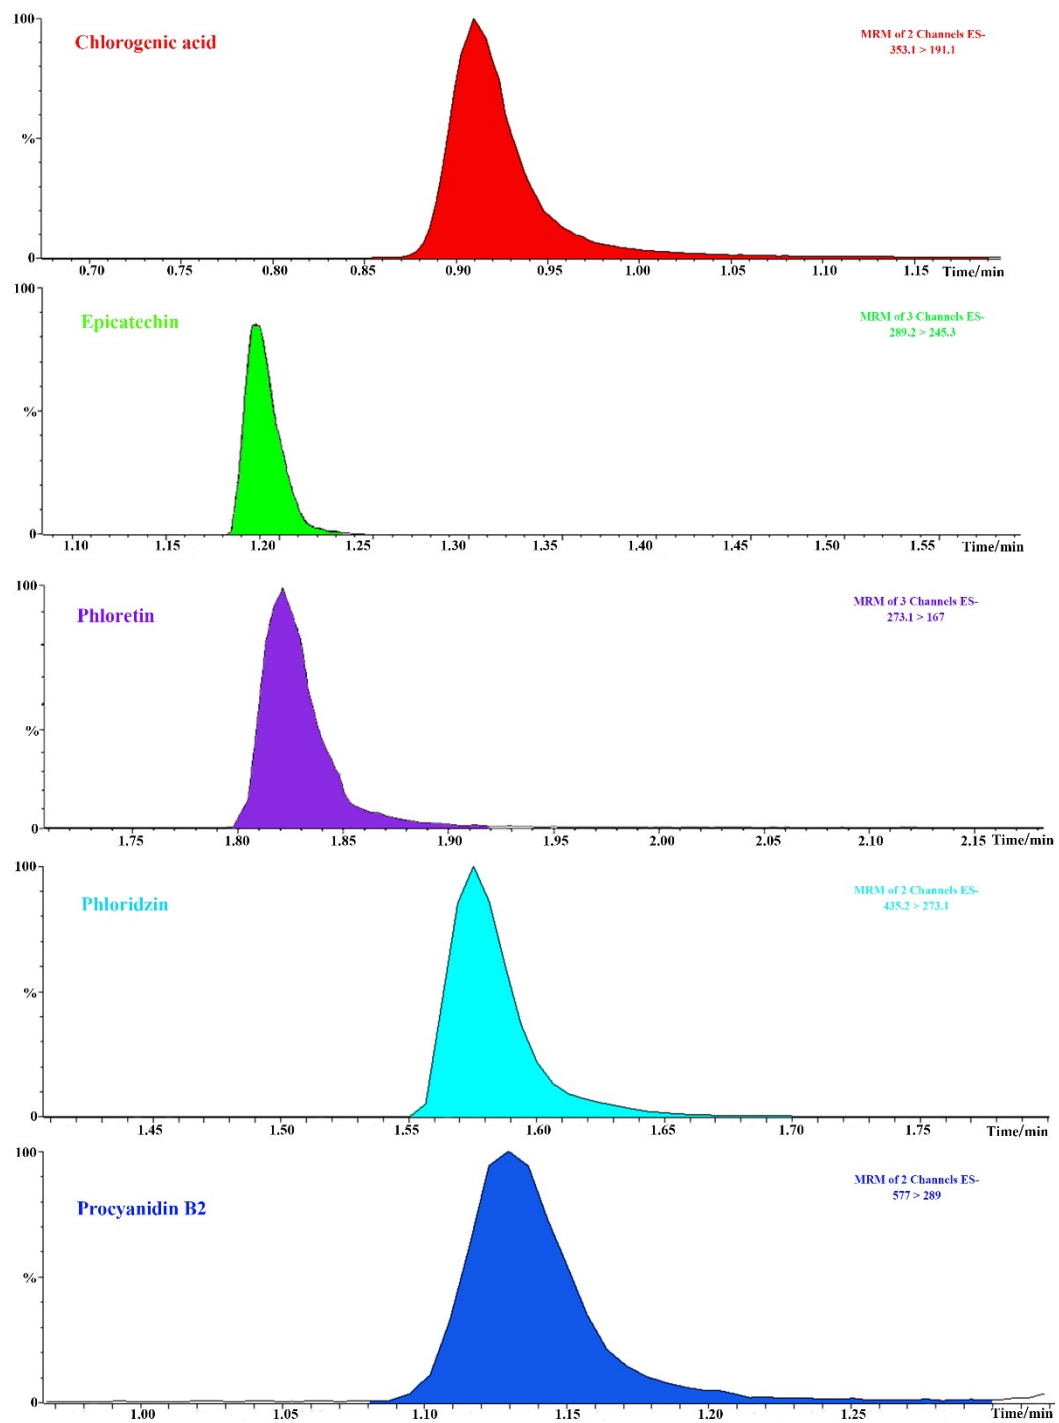

**Supplementary Figure S1** LC-MS/MS chromatograms of the most abundant five phenolic compounds identified in apple phenolic extract (APE).
